# Supplementary material for: Astrocytic mitochondrial transfer to brain endothelial cells and pericytes in vivo increases with aging
Source: PubMed Central journal article supplement — J Cereb Blood Flow Metab. 2024 Dec 12;46(2):418–29. doi: 10.1177/0271678X241306054 (PMC11638933; doi:10.1177/0271678x241306054), 2024-12-12
Supplement: sj-pdf-1-jcb-10.1177_0271678X241306054.pdf [file sj-pdf-1-jcb-10.1177_0271678X241306054.pdf]

**Supplementary Video:**

Primary BMECs were cultured in glass bottom chamber slide and treated with mtD2 astrocyte EV-Mitos for 48 hrs. Cells were stained with Hoechst dye (1ug/ml). After washing live cell images were taken using Nikon AXR, 60X oil objective (transferred mitochondria- green; Hoechst-blue). Mitochondrial movement was monitored for 5-10 minutes for every 5 seconds and movie was made in Nikon NIS-elements (512x 512 pixels; 12.5 frames/second).
